# 1 Tracking the cells of tumor origin in breast organoids by light sheet microscopy

2 Alladin A<sup>1\*</sup>, Chaible L<sup>1\*</sup>, Reither S<sup>2</sup>, Löschinger M<sup>3</sup>, Wachsmuth M<sup>3</sup>, Hériché JK<sup>1</sup>, Tischer C<sup>4</sup>,  
3 Jechlinger M<sup>1#</sup>

4  
5 1 Cell Biology and Biophysics Unit, EMBL, Heidelberg, Germany

6 2 Advanced Light Microscopy Facility, EMBL, Heidelberg, Germany

7 3 Luxendo Light-Sheet, Bruker Corporation, Heidelberg, Germany

8 4 Centre for Bioimage Analysis, EMBL, Heidelberg, Germany

9 \* Contributed equally

10 # to whom correspondence should be sent

11

## 12 Abstract

13 How tumors arise from individual transformed cells within an intact epithelium is a central,  
14 yet unanswered question. Here, we developed a new methodology that combines breast  
15 tissue organoids, where oncogenes can be switched on in single cells, with light-sheet  
16 imaging that allows us to track cell fates using a big-image-data analysis workflow. The  
17 power of this integrated approach is illustrated by our finding that small local groups of  
18 transformed cells form tumors while isolated transformed cells do not.

## 19 Main Text

20 Organoid cultures grown from cell-lines or primary cells have been successfully employed to  
21 study molecular mechanisms during different stages of tumorigenesis<sup>1-3</sup>. However, they  
22 usually allow oncogenic activation in all cells of the tissue and therefore cannot reproduce  
23 the localized transformation at a defined part of the tissue that is seen in the patient situation.  
24 Hence, stochastic tumor models need to be established wherein only a few tumorigenic cells  
25 expand in a normal epithelium. It is of key importance to visualize the interactions between a  
26 transformed cell and the normal neighboring epithelium in order to better understand the  
27 tumor initiation process in the context of its immediate microenvironment<sup>4</sup>.

28 Long term imaging of complex primary organoids has been achieved via light-sheet  
29 microscopy<sup>5,6</sup> and have benefited from the lower phototoxicity. However, past advancements  
30 still came with trade-offs resulting in limited cellular and temporal resolution. Tracking single  
31 cell dynamics necessitates high resolution imaging which in turn limits the time frame in which  
32 organoids can be imaged without phototoxic effects<sup>7</sup>. Conversely, imaging primary organoids  
33 for longer time periods requires an offset of temporal and cellular resolution that eventually  
34 cannot allow single cell fate tracking<sup>8</sup>.

35 Here we present a novel stochastic model of breast tumorigenesis where only single cells  
36 express oncogenes in primary murine organoids. We thereby overcome the above-  
37 mentioned limitations of studying tumorigenesis events. Furthermore, we report long-term  
38 imaging of these organoids for the first time at a temporal resolution that allows us to follow  
39 single cell fates. We also integrate this approach with an image analysis pipeline capable of  
40 segmenting cells in their dynamic progression towards tumorigenesis, so they can be tracked  
41 individually over time.

42 For modelling tumorigenesis in breast tissue, we use an inducible model of breast cancer<sup>9-11</sup>  
43 that has been shown to recapitulate hallmarks of human breast disease<sup>3, 12</sup> (Fig.1a). In this  
44 tractable transgenic mouse model, the activity of two potent oncogenes -Myc and Neu (the  
45 rodent homolog for the human HER2 gene)- can be spatially limited by tissue specific  
46 expression of the rtTA inducer-protein to the cells of the mammary lineage and temporally  
47 controlled by the addition of doxycycline in the media or animal diet<sup>13</sup>. We adapt this tissue  
48 wide tumorigenesis model (tri-transgenic (T) model) to generate a stochastic system by  
49 retaining only the oncogenic constructs (bi-transgenic (B) model). The rtTA inducer gene is  
50 then lentivirally delivered to single cells, preventing tissue wide transformation.

51 Primary mammary epithelial cells derived from transgenic mice were seeded in 3D matrigel  
52 as single cells, to form small acini. A small number of single cells in these acini were then  
53 transduced with lentiviral particles (Fig.1a, middle panel). In the tissue-wide tumorigenesis  
54 model(T), organoids were transduced with the reporter virus (pLv-pGK-H2B-GFP) that marks  
55 a subset of cells with H2B-GFP, while tissue wide rtTA expression is driven in all cells (Fig.1a,  
56 upper panel). To achieve stochastic tumorigenesis, bi-transgenic (B) organoids were  
57 transduced with the inducer-reporter virus (pLv-pGK-rtTA-p2A-H2B-GFP) that expresses  
58 rtTA and reporter H2B-GFP in only these single cells within the normal epithelium (Fig.1a,  
59 lower panel). Then, doxycycline was supplemented in the media to induce tumorigenic  
60 growth in rtTA expressing cells. Immunofluorescent staining of 3D matrigel cultures, for both  
61 sets of doxycycline-induced transduced organoids, was used to validate transgene specific  
62 protein expression of the c-MYC oncogene in only the transduced cells of B organoids as  
63 opposed to all cells of T organoids (Fig.1b). qPCR analysis of *Myc* and *Neu* mRNA expression  
64 was performed to normalize doxycycline dosage in both systems (Supplementary Fig.1).

65 Next, we bred the nuclear reporter H2B-mCherry into the T and B mice to mark all the cells  
66 in the organoids for inverted light-sheet microscopy (Luxendo InVi SPIM, Supplementary  
67 Fig.2). The InVi SPIM was adjusted for non-phototoxic, long-term imaging (up to 4 days,  
68 every 10 minutes with 1  $\mu$ m z-spacing). The T/H2B-mCherry organoids transduced with

69 reporter virus proliferated swiftly upon doxycycline addition showing expansion of both the  
70 marked and unmarked cells (Fig.1c); a sturdy tumor phenotype developed, manifested by  
71 multi-cell-layered rims and pronounced proliferation-associated-apoptosis in all organoids  
72 (Supplementary movie 1). In contrast, B/H2B-mCherry organoids transduced with inducer-  
73 reporter virus, displayed phenotypic variation upon induction of oncogenes in the transduced  
74 cells. Some organoids showed fast clonal expansion of oncogene-expressing cells that form  
75 multilayer clusters in the organoid rim. This proliferative phenotype seems to stem from  
76 several transduced cells in vicinity to each other at the start of time lapse imaging (Fig.1d,  
77 upper panel; Supplementary movie 2). Other, more sparsely infected organoids, did not  
78 sustain proliferation of the oncogene-expressing cells (Fig.1d, lower panel; Supplementary  
79 movie 3). Immunofluorescent staining 3D matrigel cultures for both sets of doxycycline-  
80 induced transduced organoids was performed to exclude imaging artefacts; consistent with  
81 the light-sheet movies, 3D gels grown in the incubator showed a similar dual phenotype for  
82 B organoids while T organoids consistently formed tumors upon oncogene induction  
83 (Supplementary Fig.3).

84 To analyze the dual-color light-sheet movies (H2B-mCherry—all cells in the organoid, H2B-  
85 GFP—transduced cells within the organoid) on a single cell level, we developed a big data  
86 compatible image analysis pipeline, using Fiji<sup>14</sup> (plugins Big Data Processor<sup>15</sup> and CATS<sup>16</sup>) and  
87 Imaris<sup>17</sup>, for efficient visualization of longitudinal image data, cell segmentation and tracking  
88 in 3D (Fig.2a, Supplementary Fig.4 and Fig.5). Cell tracking allowed us to follow the clonal  
89 evolution for each transduced cell in the organoid over 3 days. Single transduced cells within  
90 one organoid show a difference in proliferation and cell fate as indicated in representative  
91 tracks (Fig.2b).

92 To better understand the parameters that positively affect a transduced cell in the stochastic  
93 tumorigenesis model to start proliferating and establishing a tumor within a normal  
94 epithelium, we extracted 9 features of the organoids (n=20) and all the transduced cells in  
95 these organoids (n=150) at the start of the imaging (Fig.2c, left panel). Following observations  
96 that tumors originate from groups of independently transduced oncogene expressing cells,  
97 we defined clusters of cells in the stochastic model that contain both oncogene-expressing  
98 cells as well as normal cells of the organoid and thereby can be used to ascertain the effect  
99 of the immediate microenvironment on tumor cell proliferation. Since all the oncogene  
100 expressing cells could be tracked over time, each cluster was associated with either a tumor  
101 outcome, or a failure to do so. To identify which features were linked to this outcome, we  
102 fitted a logistic regression model that shows that only one feature, the “number of transduced

103 cells in the cluster”, positively drives tumor formation within an organoid. Each additional  
104 transduced cell in a cluster increases the odds of this cluster forming a tumor by 9 (Fig.2c,  
105 lower right panel). This is further demonstrated by representative organoids shown in Fig.2d  
106 where the cells that are likely to proliferate, cluster together at the start of the time lapse  
107 imaging and the non-proliferative cells are more sparsely located within the organoid, as  
108 verified by the hierarchical cluster analysis.

109 Our results indicate that a proximity-controlled interaction or signaling network between  
110 different transformed cells might be imperative to tumor outgrowth in a normal epithelium.  
111 This might be due to the repressive effect that an intact polarized tissue layer exerts on single  
112 early stage cancerous cells<sup>18</sup> or rooted in paracrine effects (e.g.via microRNAs<sup>19</sup>). Indeed,  
113 studies on loss of important polarity proteins have highlighted their function as non-canonical  
114 tumor suppressors in breast tumorigenesis<sup>20, 21</sup>, however, other reports<sup>22, 23</sup> cannot confirm  
115 these observations which were all obtained from tissue wide transformed model systems.  
116 Clearly, to better interrogate deficiencies in cell-cell interactions and to settle such conflicting  
117 reports, there is a need for a more detailed analysis, employing a model system that does  
118 not show modification of all cells in the tissue.

119 The interaction of tumor cells with the immediate microenvironment has been subject of  
120 extensive studies with regards to immune cells<sup>24</sup> and other tumor associated celltypes<sup>4</sup>,  
121 however, the interaction with the normal neighboring cells has not been explored in real time  
122 using an organotypic model system. Here, we have developed an integrated approach that  
123 allows us to follow cell fates in the first stochastic breast tumor model of primary cells. The  
124 amenability of this system to interference with small molecule inhibitors, viral shRNA vectors  
125 and genomic editing has the potential to further our understanding of the mechanisms  
126 important during tumor initiation. The ability to distinguish marked tumor cells from the  
127 normal epithelium will now allow us to perform single cell RNA sequencing analysis on select  
128 sorted cells. This will help delineate the signaling networks within the immediate tumor  
129 microenvironment.

130 Taken together, we strongly believe that our integration of a true stochastic tumor model with  
131 the ability to image single-cell fates will successfully bridge the gap between genetically  
132 modified model systems and the clinical situation, helping gain novel insights on breast  
133 cancer.

134

135

136 **References**

- 137 1. Clevers, H. Modeling Development and Disease with Organoids. *Cell* **165**, 1586-  
138 1597 (2016).
- 139 2. Simian, M. & Bissell, M.J. Organoids: A historical perspective of thinking in three  
140 dimensions. *J Cell Biol* **216**, 31-40 (2017).
- 141 3. Havas, K.M. *et al.* Metabolic shifts in residual breast cancer drive tumor recurrence.  
142 *J Clin Invest* **127**, 2091-2105 (2017).
- 143 4. Tabassum, D.P. & Polyak, K. Tumorigenesis: it takes a village. *Nature reviews.*  
144 *Cancer* **15**, 473-483 (2015).
- 145 5. Verissimo, C.S. *et al.* Targeting mutant RAS in patient-derived colorectal cancer  
146 organoids by combinatorial drug screening. *Elife* **5** (2016).
- 147 6. Drost, J. *et al.* Sequential cancer mutations in cultured human intestinal stem cells.  
148 *Nature* **521**, 43-47 (2015).
- 149 7. Held, M., Santeramo, I., Wilm, B., Murray, P. & Levy, R. Ex vivo live cell tracking in  
150 kidney organoids using light sheet fluorescence microscopy. *PLoS one* **13**, e0199918  
151 (2018).
- 152 8. Dekkers, J.F. *et al.* Characterizing responses to CFTR-modulating drugs using rectal  
153 organoids derived from subjects with cystic fibrosis. *Science translational medicine*  
154 **8**, 344ra384 (2016).
- 155 9. Podsypanina, K., Politi, K., Beverly, L.J. & Varmus, H.E. Oncogene cooperation in  
156 tumor maintenance and tumor recurrence in mouse mammary tumors induced by  
157 Myc and mutant Kras. *Proceedings of the National Academy of Sciences of the*  
158 *United States of America* **105**, 5242-5247 (2008).
- 159 10. Moody, S.E. *et al.* Conditional activation of Neu in the mammary epithelium of  
160 transgenic mice results in reversible pulmonary metastasis. *Cancer cell* **2**, 451-461  
161 (2002).
- 162 11. Fry, E.A., Taneja, P. & Inoue, K. Clinical applications of mouse models for breast  
163 cancer engaging HER2/neu. *Integr Cancer Sci Ther* **3**, 593-603 (2016).
- 164 12. Jechlinger, M., Podsypanina, K. & Varmus, H. Regulation of transgenes in three-  
165 dimensional cultures of primary mouse mammary cells demonstrates oncogene  
166 dependence and identifies cells that survive deinduction. *Genes & development* **23**,  
167 1677-1688 (2009).
- 168 13. Bockamp, E. *et al.* Of mice and models: improved animal models for biomedical  
169 research. *Physiol Genomics* **11**, 115-132 (2002).
- 170 14. Schindelin, J. *et al.* Fiji: an open-source platform for biological-image analysis.  
171 *Nature methods* **9**, 676-682 (2012).
- 172 15. Tischer, C., Norlin, N. & Pepperkok, R. "BigDataProcessor; Fiji plugin for visual  
173 inspection and processing of big image data.  
174 <http://doi.org/10.5281/zenodo.2574702>. (2019).
- 175 16. Tischer, C. & Pepperkok, R. CATS: Fiji plugin for context aware trainable  
176 segmentation of big image data. <http://doi.org/10.5281/zenodo.2574736>. (2019).
- 177 17. Imaris x64, v., Bitplane AG (Software available at <http://bitplane.com>).
- 178 18. Lee, M. & Vasioukhin, V. Cell polarity and cancer--cell and tissue polarity as a non-  
179 canonical tumor suppressor. *Journal of cell science* **121**, 1141-1150 (2008).
- 180 19. Kosaka, N. *et al.* Competitive interactions of cancer cells and normal cells via  
181 secretory microRNAs. *The Journal of biological chemistry* **287**, 1397-1405 (2012).
- 182 20. McCaffrey, L.M., Montalbano, J., Mihai, C. & Macara, I.G. Loss of the Par3 polarity  
183 protein promotes breast tumorigenesis and metastasis. *Cancer cell* **22**, 601-614  
184 (2012).
- 185 21. Partanen, J.I. *et al.* Tumor suppressor function of Liver kinase B1 (Lkb1) is linked to  
186 regulation of epithelial integrity. *Proceedings of the National Academy of Sciences of*  
187 *the United States of America* **109**, E388-397 (2012).

- 188 22. Xue, B., Krishnamurthy, K., Allred, D.C. & Muthuswamy, S.K. Loss of Par3 promotes  
189 breast cancer metastasis by compromising cell-cell cohesion. *Nature cell biology*  
190 **15**, 189-200 (2013).  
191 23. Macara, I.G. & McCaffrey, L. Cell polarity in morphogenesis and metastasis.  
192 *Philosophical transactions of the Royal Society of London. Series B, Biological*  
193 *sciences* **368**, 20130012 (2013).  
194 24. Binnewies, M. *et al.* Understanding the tumor immune microenvironment (TIME) for  
195 effective therapy. *Nature medicine* **24**, 541-550 (2018).  
196

## 197 **Author Information**

198 These authors contributed equally: Ashna Alladin, Lucas Chaible

## 199 **Affiliations**

200 *Cell Biology and Biophysics Unit, EMBL, Heidelberg, Germany*

201 Ashna Alladin, Lucas Chaible, Jean-Karim Hériché & Martin Jechlinger

202 *Advanced Light Microscopy Facility, EMBL, Heidelberg, Germany*

203 Sabine Reither

204 *Luxendo Light-Sheet, Bruker Corporation, Heidelberg, Germany*

205 Monika Löschinger & Malte Wachsmuth

206 *Centre for Bioimage Analysis, EMBL, Heidelberg, Germany*

207 Christian Tischer

## 208 **Contributions**

209 M.J. and L.C. conceived the model system idea. L.C. performed the cloning and culture experiments.

210 A.A. performed the imaging and implemented the image analysis workflows. T.C. developed the Fiji  
211 plugins and designed the image analysis workflow. S.R., M.W., and M.L. provided support for imaging.

212 J.K.H. performed the computational feature analysis. A.A. and M.J. wrote the manuscript and all  
213 authors provided feedback. M.J. supervised the work.

## 214 **Acknowledgements**

215 The authors want to thank Sylwia Gawrzak, Ksenija Radic, Rocio Sotillo, Robert Prevedel and Jan  
216 Ellenberg for critically reading the manuscript and Marta Garcia Montero for mouse husbandry. This  
217 study was technically supported by EMBL Advanced Light Microscopy Facility (ALMF) and the EMBL  
218 Laboratory for Animal Resources (LAR).

## 219 **Competing interests**

220 ML and MW are employed by Luxendo GmbH, FM BU, Bruker Nano Surfaces, Heidelberg, Germany,  
221 the manufacturer of the InVi SPIM light-sheet microscope

## 222 **Corresponding author**

223 Correspondence to Martin Jechlinger

224



**Tissue-wide tumorigenesis model**

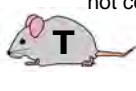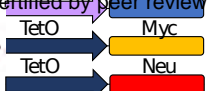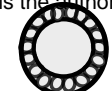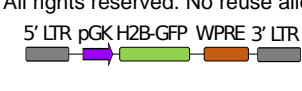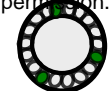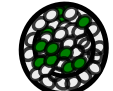

**Stochastic tumorigenesis model**

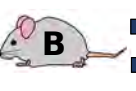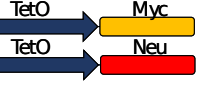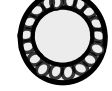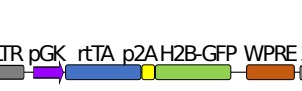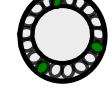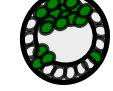

Normal acini

Lentiviral particles

Transduced acini

Tumorigenic acini

Primary mammary epithelial cells seeded in matrigel cultures

Matrigel digested to release organoids

Organoids and lentivirus re-seeded into matrigel cultures

Oncogenes induced with doxycycline

**b.**

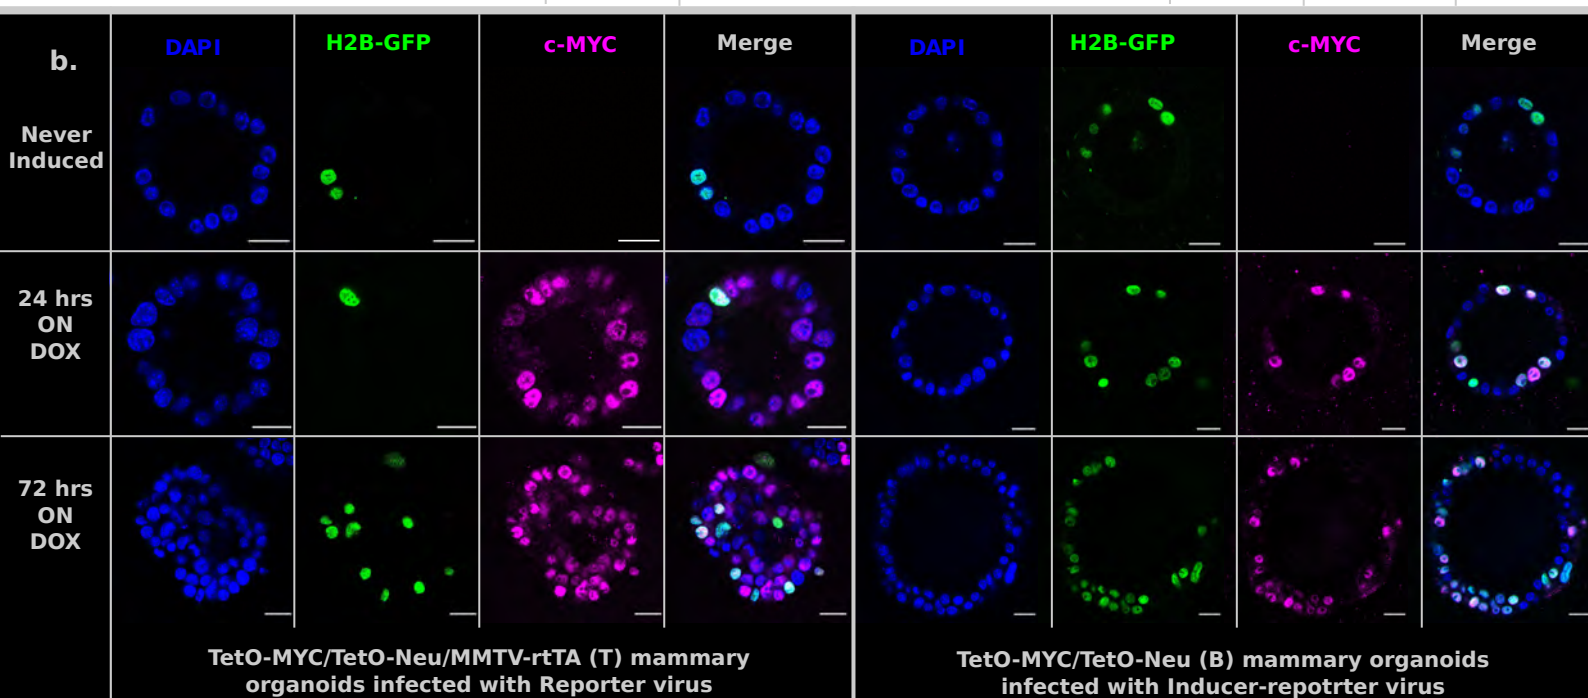

**c.**

H2B-mCherry marked TetO-MYC/TetO-Neu/MMTV-rtTA (T) mammary organoids infected with Reporter virus

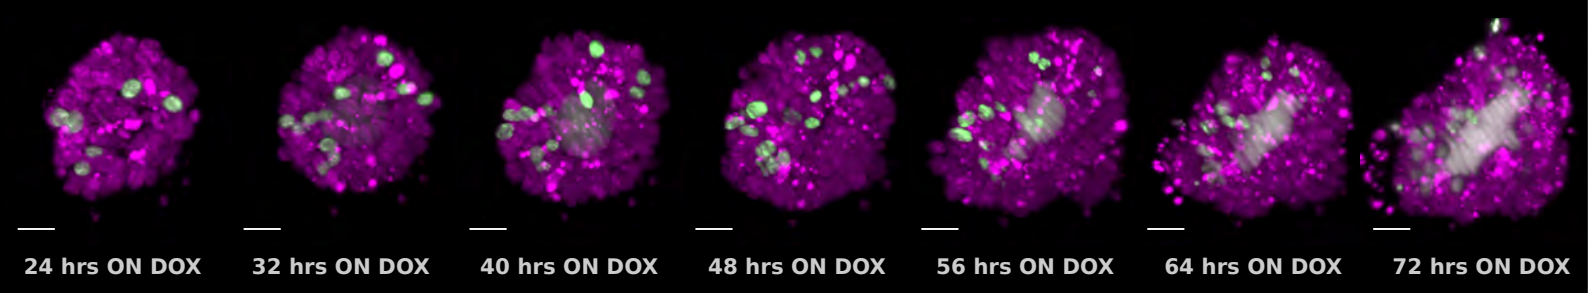

**d.**

H2B-mCherry marked TetO-MYC/TetO-Neu (B) mammary organoids infected with Inducer-reporter virus

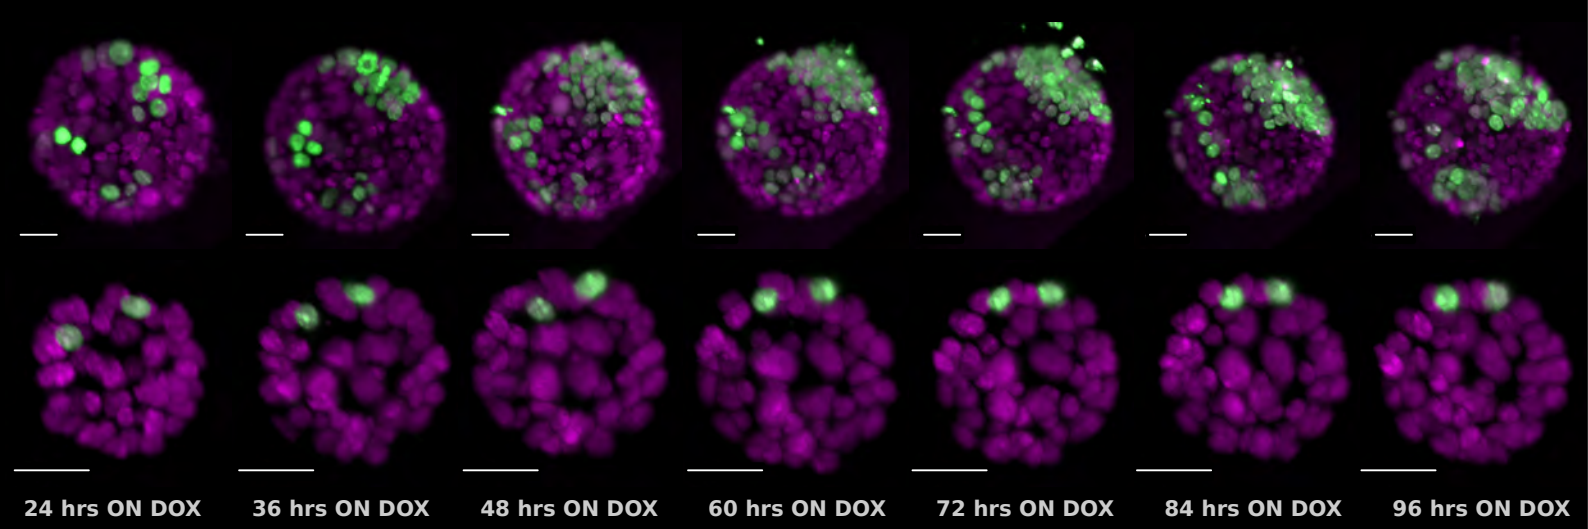

225 **Figure 1. Characterization and imaging of stochastic tumorigenesis in mammary**  
226 **organoids**

227 **(a)** Schematic representation of the mouse models and the *in vitro* culture methods used.  
228 Organoids are grown from single cells harvested from the mammary glands of either bi-  
229 transgenic (B) or tri-transgenic (T) mice, transduced with lentiviral particles in solution and re-  
230 seeded into 3D cultures. Doxycycline is added to the media to induce the expression of  
231 oncogenes in cells expressing rtTA. B mice have the c-MYC and Neu oncogene constructs  
232 in their genome. These oncogenes are activated in single cells infected with the Inducer-  
233 reporter (pLenti-rtTA-GFP) lentiviral particles, in the presence of doxycycline — modelling  
234 stochastic breast tumorigenesis (bottom panel). T mice have the rtTA transducer construct  
235 along with the oncogenes and all cells in T organoids can be induced to express oncogenes  
236 in 3D culture in the presence of doxycycline. T mice infected with Reporter (pLenti-NULL-  
237 GFP) lentiviral particles are used as infection controls (top panel). Both viral particles mark  
238 single cells in the organoids with H2B-GFP.

239  
240 **(b)** Representative immunofluorescence staining images of fixed 3D gels with B organoids  
241 transduced with Inducer-reporter virus or T organoids transduced with Reporter virus before  
242 induction (top), 24 hours post induction (middle) and 72 hours post induction (bottom)  
243 with doxycycline. GFP expressing transduced cells (green), c-MYC oncogene (magenta),  
244 DAPI nuclear stain (blue). Scale bar, 10µm.

245  
246 **(c)** 3D images of selected timepoints during live-cell time-lapse microscopy of induced T  
247 organoids transduced with Reporter virus. GFP expressing transduced cells (green), c-MYC  
248 oncogene (magenta)

249  
250 **(d)** B organoids transduced with Inducer-reporter virus. GFP expressing transduced cells  
251 (green), c-MYC oncogene (magenta). Imaging was started 24 hours after oncogenic induction  
252 with doxycycline. The upper panel shows the proliferative phenotype seen with stochastic  
253 transformation, whereas the lower panel shows the non-proliferative phenotype observed in  
254 some stochastically transformed organoids. (Imaging conditions: H2B-mCherry 594nm Ex,  
255 610 LP Em; H2B-GFP 488nm Ex and 497-554 nm Em). Scale bar, 20µm.

256



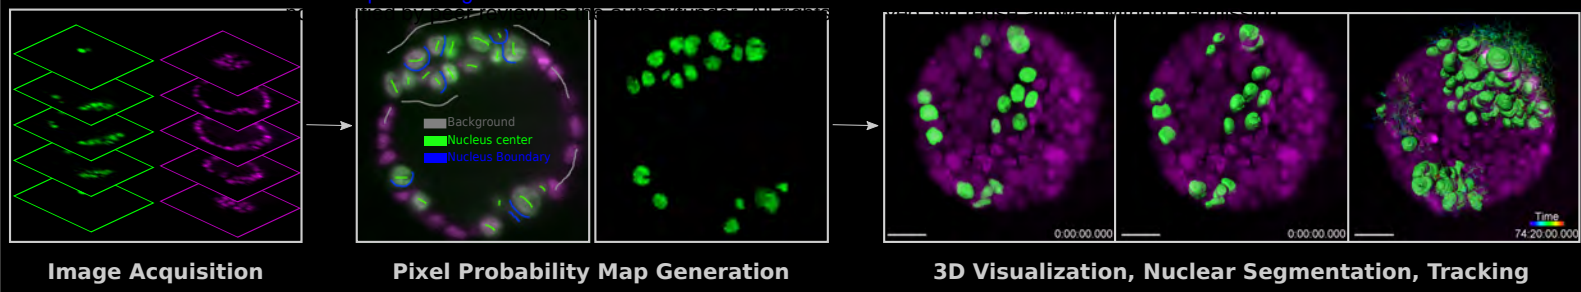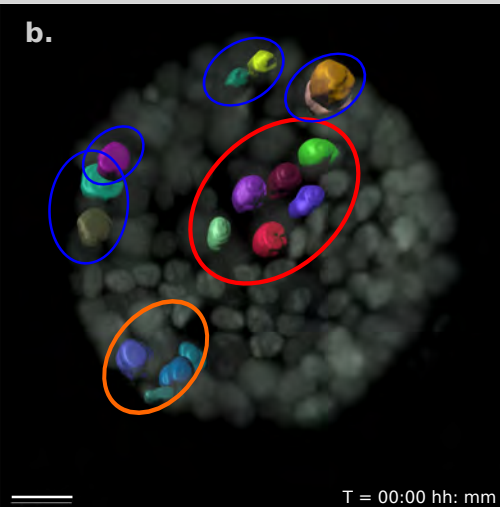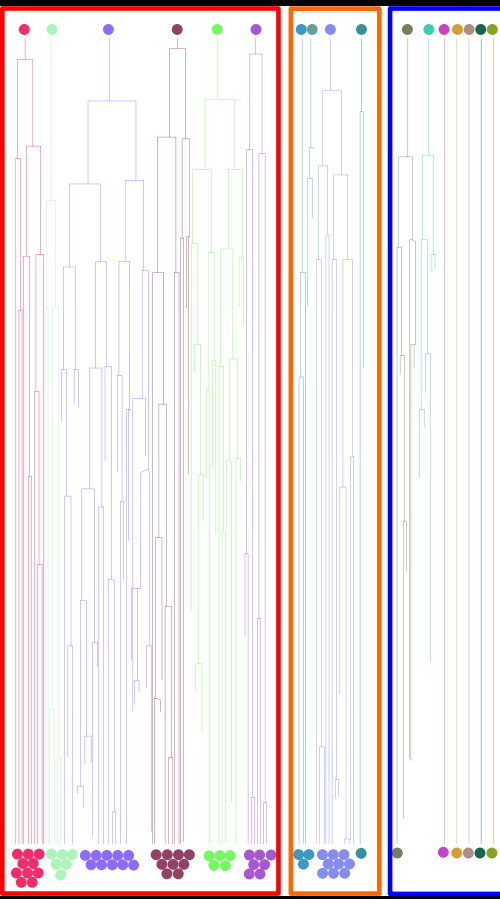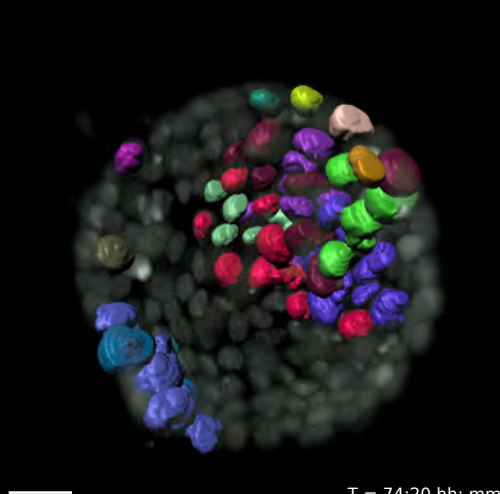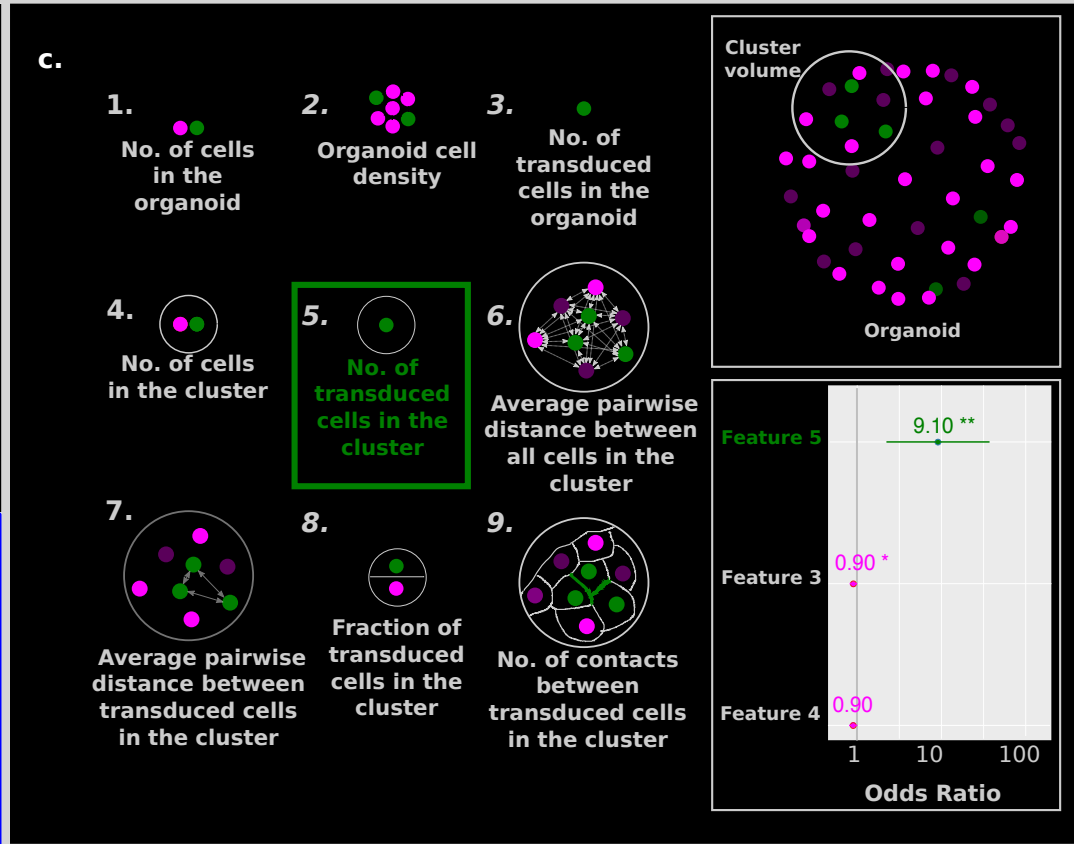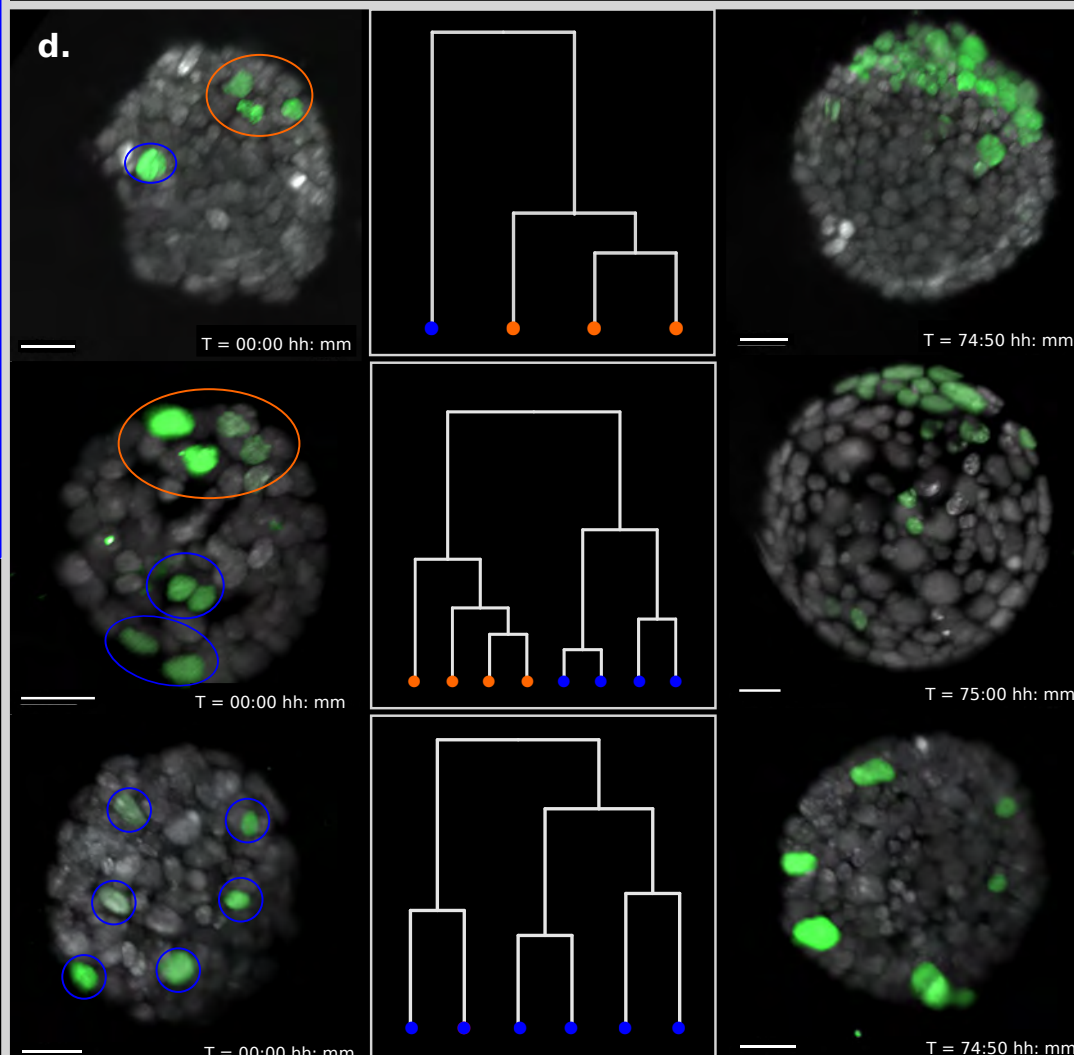

257 **Figure 2. Proximity of transformed cells in a normal epithelium enhances tumor**  
258 **proliferation and establishment.**

259 **(a)** Schematic representation of the big-image data analysis pipeline developed to analyze  
260 the light sheet microscopy images. Images are acquired in two channels (H2B-mCherry in  
261 magenta and H2B-GFP in green) at 10-minute intervals for 3-4 days. Big Data Processor Fiji  
262 plugin is used to pre-process the raw images and CATS Fiji plugin is used for generation of  
263 pixel probability maps (Supplementary Fig.4). Image pixels of the H2B-GFP images are  
264 classified into background (black), nucleus centre (green), nucleus boundary (blue) classes  
265 by manual training. Processed raw images along with the probability maps from the nucleus  
266 center channel (green) are exported to Imaris for 3D visualization, nuclear segmentation and  
267 single cell tracking.

268  
269 **(b)** Single cell tracking results for every cell in a representative B organoid transduced with  
270 the Inducer-reporter virus. Top panel shows the organoid at the beginning of the time-lapse  
271 (24 hours post induction) with each transduced cell surface rendered with Imaris. The middle  
272 panel shows the lineage trees of each individual cell over the time lapse recording. Lineage  
273 trees of single cells are grouped into proliferative (highlighted in red, orange) and non-  
274 proliferative (highlighted in blue) cell clusters. The bottom panel shows the organoid at the  
275 end of the time-lapse (~76 hours post induction with doxycycline). Color coding of each cell  
276 maintained in all panels. Scale bar, 15 $\mu$ m.

277  
278 **(c)** Schematic representation of the 9 features of stochastically transformed cells extracted  
279 at the beginning of time lapse imaging. These features were assessed for their impact on  
280 tumor cell proliferation within B organoids transduced with the Inducer-reporter virus using  
281 logistic regression. Lower right panel: Coefficients (represented as odds ratios) of the three  
282 features included in the best logistic regression model, colored horizontal bars represent the  
283 95% confidence interval of the estimate. \*\* indicates p-value (of having no effect) < 0.01, \*  
284 indicates p-value <0.05. The vertical grey line indicates the position of no effect.

285  
286 **(d)** Representative B mammary organoids stochastically transduced with the Inducer-  
287 reporter virus and induced with doxycycline. Left panels show organoids 24 hours post  
288 induction. Color highlights indicate clusters of transduced cells identified from hierarchical  
289 clustering (shown in middle panels) with proliferative clusters highlighted in orange and non-  
290 proliferative clusters highlighted in blue. Right panels show the same organoids ~72-76  
291 hours post induction. Scale bar, 20 $\mu$ m.

292  
293

## 294 **Online Material and Methods**

### 295 **Animals**

296 The mouse strains TetO-MYC/ MMTV-rtTA<sup>1</sup> and TetO-Neu/ MMTV-rtTA<sup>2</sup>, that have been  
297 previously described, were bred in order to establish the tri-transgenic strain TetO-MYC/TetO-  
298 Neu/ MMTV-rtTA (T) or bi-transgenic strain TetO-MYC/TetO-Neu (B). Reporter H2B-mCherry  
299 was crossed into the B and T lines using a R26-H2B-mCherry line {Abe, 2011 #1294}<sup>3</sup>(RIKEN,  
300 CDB0239K). All ten mammary glands were harvested (from virgin female mice between 8-10  
301 weeks old), digested and singularized for establishing organoid cultures. All mice used in this  
302 study were housed according to the guidelines of the Federation of European Laboratory  
303 Animal Science Associations (FELASA).

304 Rational for the use of these oncogenes: Her2 is overexpressed in ~20% of breast cancers<sup>4</sup>,  
305 MYC in 15-50% of human breast cancer<sup>5</sup>. The combination of Myc and Her2 is found in highly  
306 aggressive human breast cancer<sup>6</sup>:and - in fact- Her2 and MYC strongly accelerate tumour  
307 onset In the combined transgenic animals (average 45 days) as compared to single transgenic  
308 animals (MYC 155 days, Her2 99 days), In all cases tumors regress rapidly to non-palpable  
309 state following oncogene silencing.

310

### 311 **Lentivirus cloning and production**

312 The lentivirus design is based on pWPXL backbone, which was a gift from Didier Trono  
313 (Addgene #12257). The coding region from the original plasmid was excised using ClaI and  
314 NdeI in order to insert a new multiple cloning site (MCS). The pGK promoter was PCR  
315 amplified from pLVPT-GDNF-rtTR-KRAB-2SM2, which was a gift from Patrick Aebischer &  
316 Didier Trono (Addgene #11647) and cloned using XhoI and EcoRI restriction sites. For the  
317 plasmid pLenti-rtTA-GFP the synthetic region rtTA-p2A-H2B-GFP was cloned downstream of  
318 the pGK promoter using EcoRI and NheI sites. The plasmid pLenti-Null-GFP is derived from  
319 the pLenti-rtTA-GFP by removing the rtTA sequence, using the restriction sites EcoRI and  
320 BamHI, and retaining H2B-GFP in the coding region. For production of lentivirus particles, we  
321 seeded  $1.6 \times 10^7$  HEK-293T cells (Lenti-X - Clontech Cat. # 632180) in 500cm<sup>2</sup> square dishes  
322 (Corning Cat. # 431110). After 24 hours, the cells were supplemented with media containing  
323 25uM of chloroquine diphosphate (Sigma-Aldrich Cat. # C6628). After a 5-hour incubation,  
324 using 360  $\mu$ g of polyethyleimine (4  $\mu$ g for each  $\mu$ g of plasmid), we transfect the cells with a  
325 mixture of endotoxin free plasmids: 20  $\mu$ g pCMV-VSV-G (Addgene #8454); 30  $\mu$ g psPAX2  
326 (Addgene #12260); 40  $\mu$ g transfer plasmids pLenti-rtTA-GFP or pLenti-Null-GFP. We  
327 harvested the media after 48 hours, 72 hours and 96 hours after transfection. Concentration  
328 of the lentivirus from the collected media was performed using an ultracentrifuge (Beckman  
329 Sw32 rotor) at 25,000 rpm for 2h at 4°C. The lentivirus pellet was resuspended in 1000  $\mu$ l of  
330 HBBS buffer, aliquoted and stored at -80°C. The lentivirus titer was measured using FACS  
331 analyses as described by Kutner and colleagues<sup>7</sup>.

### 332 **3D organoid cultures**

333 Mammary glands harvested from mice (see above), were digested in order to prepare a single  
334 cell solution. For this, the tissue was divided in four loosely capped 50 ml falcon, each  
335 supplemented with 5 ml serum-free media (DMEM/F12 supplemented with 25mM HEPES and  
336 1% Pen Strep(100 U/ml Penicillin; 100  $\mu$ g/ml Streptomycin; ThermoFisher Cat. # 15140122))  
337 and 750 U of Collagenase Type 3(Worthington Biochemical Corp Cat. # LS004183), 20  $\mu$ g of  
338 Liberase (Roche Cat. # 5401020001) and incubated overnight at 37°C and 5%CO<sub>2</sub>. The  
339 glands were then mechanically disrupted using a 5 ml pipette, and washed in PBS before  
340 being pelleted at 1000 rpm for 5 minutes. The cell pellet was resuspended in 5 ml of 0.25%  
341 Trypsin-EDTA and incubated for 45 minutes at 37°C and 5%CO<sub>2</sub>. The enzymatic reaction was  
342 then neutralized using 40 ml of serum supplemented media (DMEM/F12 with 25mM HEPES,  
343 1% Pen Strep and 10% FBS Tetracycline Free certified (Biowest Cat. # S181T). The cells

344 were pelleted again, resuspended in Mammary Epithelial Cell Basal Medium (PromoCell Cat.  
345 # C-21210) and seeded in collagen coated plates (Corning Cat. # 354400) overnight at 37°C  
346 and 5%CO<sub>2</sub>. This allows for epithelial cells to adhere to the surface of the plates while the  
347 other cell types float on top in the media and can be easily removed by vacuum suction. The  
348 epithelial cells were detached from the collagen coated plates by incubating them with 0.25%  
349 Trypsin-EDTA for 5-7 minutes at 37°C and 5%CO<sub>2</sub>, following inactivation with serum  
350 supplemented media. The single cell solution was pelleted, resuspended in MEBM and  
351 counted. We mixed 50,000 cells with 90 µl of Matrigel Matrix basement Membrane growth  
352 factor reduced phenol red free (Corning Cat. # 356231), and seeded this mixture into a 12 well  
353 plate (Corning Cat. # 3336) and incubated it for 30-40 minutes until the matrigel solidified. The  
354 gels were supplemented with 1.5 ml MEBM and allowed to grow at 37°C and 5%CO<sub>2</sub>.  
355 For transduction, after 3 days of growth, the gels were mechanically disrupted and placed in  
356 a 15 ml falcon. Two disrupted gels were placed in one 15 ml falcon with 2ml of MEBM  
357 supplemented with 25U of Collagenase type I and 5 µg of Liberase. Following incubation in  
358 this solution for 2 hours at 37°C and 5%CO<sub>2</sub>, when the matrigel was totally digested, the  
359 organoids were washed 3 times with 15 ml of serum supplemented media and once with 15  
360 ml of serum free media, and pelleted at 1000 rpm for 5 minutes. We then supplemented the  
361 organoid pellet (from two original gels) in 10 µl of MEBM and added 6 x 10<sup>5</sup> lentivirus particles  
362 to the solution. We then mixed this solution with 90 µl matrigel and plated it in 35 mm dishes  
363 (Greiner Bio-One Cat. # 627160) and placed in incubator for 30-40 minutes until the matrigel  
364 solidified. The gels were supplemented with 3 ml MEBM and incubated for 2 days at 37°C and  
365 5%CO<sub>2</sub> in order to allow for organoid recovery and lentiviral gene expression.

366 For induction of oncogenes in the cells of the organoids, doxycycline (Sigma Cat. # D9891)  
367 was supplemented in the media. 800 ng/ml of doxycycline was used to induce T organoids  
368 and 600 ng/ml was used for B organoids. qPCR analysis was used to standardize the  
369 doxycycline dosage for B organoids (see below).

### 370 **qPCR analysis**

371 The qPCR technique was performed following the MIQE guidelines, where the total RNA was  
372 isolated from the mammary gland organoids using RNA PureLink Mini Kit (ThermoFisher Cat.  
373 # 12183018A) and 2.5ug was reverse transcribed to cDNA using SuperScript VILO cDNA  
374 Synthesis Kit (ThermoFisher Cat. # 11754050). Using Primer3 software we designed specific  
375 primers for DNA intercalating fluorescent dye approach for the transgenes Neu (Forward:  
376 CGTTTTGTGGTCATCCAGAACG and Reverse: CTTACAGCGTCTACCAGGTCACC) and c-  
377 MYC (Forward: GCGACTCTGAGGAGGAACAAGA and Reverse:  
378 CCAGCAGAAGGTGATCCAGACT). As endogenous controls, mCherry (Forward:  
379 GAGGCTGAAGCTGAAGGAC and Reverse: GATGGTGTAGTCCTCGTTGTG) and Pum1  
380 (Forward: AATGTGTGGCCGGATCTTGT and Reverse: CCCACAGTGCCTTATACACCA)  
381 were used. Primer efficiency was verified and established between 95% and 105% Each  
382 sample was analyzed in duplicate and non-template controls were used in each qPCR run.  
383 Analyses were carried out using a StepOne device (Applied Biosystems, USA). Analysis of  
384 relative gene expression data was performed according to the 2<sup>-ΔΔCq</sup> method and the  
385 results were expressed as fold change of ΔΔCq values obtained from the reference T800  
386 organoids (Supplementary Figure 1).

### 387 **Immunofluorescence staining**

388 Matrigel cultures were grown as described above and plated on Nunc™ Lab-Tek™ II (Thermo  
389 Cat. # 155382) chambers. At pre-defined timepoints, the gels were fixed using 4% PFA for 2-  
390 3 minutes, following 3 washes with PBS. The gels were blocked with 10% goat serum for 2  
391 hours at room temperature, followed by incubation with primary antibodies was done overnight  
392 at 4°C. The remaining immunofluorescence staining was performed as per standard protocol  
393 for c-MYC (Cell Signaling Technologies, Cat. # D84C12, 1:900), alpha6-integrin (Millipore Cat.



394 # MAB1378, dilution 1:80) and ZO1 (Life Technologies Cat. # 61-7300, dilution 1:500). The  
395 nuclei were counter stained with 1:1000 DAPI (ThermoFisher Cat. # 62248, 1mg/ml, dilution  
396 1:1000) and mounted in anti-fading mounting medium (VECTASHIELD® Mounting Medium  
397 with DAPI (Vecto Cat. # H1500-10)). Please note that the c-MYC antibody (Cell Signaling  
398 Technologies, Cat. # D84C12) recognizes specifically the human protein, which is  
399 transgenically expressed and does not recognize endogenous mouse MYC protein.  
400 Stained gels were imaged on Leica SP5 confocal microscope using 63x water lens and the  
401 LAS AF imaging software.

402

## 403 **Light sheet microscopy**

### 404 **Sample holder preparation and mounting:**

405 Imaging was performed on the InVi SPIM inverted light-sheet microscope (Luxendo Light-  
406 Sheet, Bruker Corporation). Sample mounting for the InVi SPIM is suitable for 3D matrigel  
407 cultures that are used to grow and transduce mammary organoids (see above). The sample  
408 holder is made of medical grade plastic (PEEK). A 25  $\mu\text{m}$  thin membrane (FEP; Luxendo) with  
409 a refractive index matching that of water is glued to the upper surface of a groove in the sample  
410 holder with a biocompatible silicone glue (Silpuran 4200; Wacker), forming a trough with  
411 transparent bottom (Supplementary Fig. 2). Matrigel cultures were carefully cut with a scalpel  
412 into rectangular slivers and transferred onto the FEP membrane's trough. Once the gel sliver  
413 was aligned in place, 20-30  $\mu\text{l}$  of fresh matrigel drops were poured onto the gel sliver in the  
414 sample holder until there was a thin layer of liquid matrigel on top of the gel sliver. The setup  
415 was incubated for 20 minutes at 37°C in a 5% CO<sub>2</sub> incubator to allow the matrigel layer on top  
416 to solidify. Once the gel was solidified, 600-800  $\mu\text{l}$  of MEBM supplemented with/without  
417 doxycycline was added to the sample holder's FEP sheet trough. Preferably, freshly mounted  
418 sample gels were allowed to settle overnight in the incubator to prevent any gel drift during  
419 imaging, when the holder is placed into the imaging chamber of the microscope. The imaging  
420 chamber acts as an incubator with environmental control and it has a reservoir for immersion  
421 medium, which is filled with water so that both objective lenses and the bottom of the sample  
422 holder are below the water surface (Supplementary Figure 2).

### 423 **Imaging configuration and conditions:**

424 The InVi SPIM is equipped with a Nikon CFI 10x/0.3NA water immersion lens for illumination  
425 and a Nikon CFI-75 25x/1.1NA water immersion lens for detection. For excitation of GFP and  
426 mCherry, 488 nm and 594 nm laser lines were used, respectively, while emission was selected  
427 using a 497-554 nm band pass filter and a 610 nm long pass filter, respectively. 3D image  
428 stacks were acquired with a light-sheet thickness of 4  $\mu\text{m}$ , a final magnification of 62.5x,  
429 resulting in 104 nm pixel size. The In-Vi SPIM environmental control was set to 37 °C, 5% CO<sub>2</sub>  
430 and 95% humidity. A series of optimization experiments, involving different laser powers,  
431 exposure times and z-step sizes yielded laser powers of 13  $\mu\text{W}$  for 488 nm and 36  $\mu\text{W}$  for  
432 594 nm, 100 millisecond exposure time per frame and 1  $\mu\text{m}$  z-spacing between frames to be  
433 optimal for long term imaging (96-120 hours) without photo-bleaching or photo-toxic effects  
434 on growth.

435 Images were recorded as 2D planes ranging from 100-500 in number, depending on the  
436 organoid size. Each 3D stack of planes was recorded in 2 channels - mCherry (all cells) and  
437 GFP (transduced cells). Depending on the duration of the time lapse imaging, 450-600 image  
438 stacks (equivalent to ~72-96 hours) were recorded per organoid at 10-minute intervals.

### 439 **Image Analysis**

440 Big Data Processor<sup>8</sup>, a Fiji plugin for lazy loading of big image data, was used to visualize the  
441 images in 2D slicing mode, crop stacks in x, y, z, and t, bin images (3 x 3 x 1 in x, y, z), perform  
442 chromatic shift correction between channels and convert .h5 files from the InVi SPIM into an



443 Imaris compatible multi-resolution file format (.ims) for further analysis (Supplementary Fig.  
444 4).

445 The oncogenic cells (H2B-GFP channel) displayed heterogeneous morphologies as well as  
446 varying intensity textures, making it difficult to segment them using conventional thresholding  
447 approaches. We thus used a trainable segmentation approach to convert the raw intensity  
448 values into pixel probability maps, using the Fiji plugin CATS<sup>9</sup> (Context Aware Trainable  
449 Segmentation) . Using the H2B-GFP channel images as input, we trained three pixel  
450 classes: background, nucleus center and nucleus boundary. For training we drew about  
451 20(background), 120(nucleus center), 100(nucleus boundary) labels distributed across the  
452 different time-frames of the movie. After feature computation and training of a Random  
453 Forest classifier the whole dataset was processed on EMBL's high performance computer  
454 cluster. The segmentation of one data set -typically 100 timepoints- is distributed across few  
455 hundred jobs, each job using 32 GB RAM, 16 cores, and running for about 30 minutes. The  
456 nucleus center probability maps were then exported from CATS and added as an additional  
457 channel to the converted intensity data (Supplementary Fig. 4).

458 The data were then loaded into Imaris<sup>10</sup> for 3D visualization and further processing. Using the  
459 Imaris' Surfaces function, we segmented the nucleus center probability maps into objects. To  
460 do so, probability maps were manually thresholded, using a surface smoothing parameter  
461 of 0.3  $\mu\text{m}$ ; the minimum quality parameter for seed points was set to 0.1, and object splitting  
462 was applied for objects larger than 5.5  $\mu\text{m}$ . Objects with volumes less than 20  $\mu\text{m}^3$  were  
463 excluded. Next, all objects were tracked over time using Imaris' Lineage tracking algorithm  
464 with a maximum distance between objects in subsequent time-points limited to 10  $\mu\text{m}$  and a  
465 maximum gap size between identification of the object in a particular track limited to 10 time  
466 points. Analysis of segmentation results is shown in Supplementary Figure 5. Most of the  
467 errors in the object segmentation were false merges, where two cells were segmented as one.  
468 This kind of error is frequently not sustained in the previous or following time-points and the  
469 maximum gap size parameter of the tracking algorithm thus frequently provides correct tracks  
470 nonetheless. The resulting lineage trees of proliferating tumour cells within the organoid were  
471 corrected manually within Imaris, e.g., excluding apoptotic cells and auto-fluorescent debris.  
472 Center of mass coordinates of each cell were measured and exported from Imaris for  
473 subsequent feature analysis (Figure 2c).

474

## 475 **Feature Analysis**

476 Observations suggest that tumors in organoids originate from clusters of oncogene-  
477 expressing cells produced by independent transduction events. To identify these clusters, we  
478 computed the pairwise Euclidean distances between all oncogene-expressing cells in an  
479 organoid at the start of the experiment and applied hierarchical clustering with complete  
480 linkage. Clusters were identified automatically by cutting the branches of the trees using the  
481 dynamic tree cut algorithm<sup>11</sup>. This defined a cluster as a group of oncogene-expressing cells  
482 that are closer to each other than to other oncogene-expressing cells of the same organoid.  
483 Note that a cluster can be composed of a single cell if this cell is comparatively isolated from  
484 other transduced cells. For each cluster we identified the following features as possibly linked  
485 to tumor formation: (1) number of cells in the organoid (2) cell density expressed as the ratio  
486 of number of cells to organoid surface area computed by assuming the organoid is a sphere  
487 with diameter equal to the distance between the two most distant cells (3) number of  
488 oncogene-expressing cells in the organoid (4) number of cells (including both oncogene-  
489 expressing and normal cells) in the cluster volume defined as the sphere centered at the  
490 center of mass of the cluster with diameter equal to the distance between the two farthest  
491 oncogene-expressing cells of the cluster (5) number of oncogene-expressing cells in the  
492 cluster (6) average pairwise distance between all cells in the cluster volume (7) average  
493 pairwise distance between oncogene-expressing cells in the cluster (8) fraction of oncogene-

494 expressing cells in the cluster volume (9) number of contacts between oncogene-expressing  
495 cells in the cluster. Two cells are presumed in contact if they are less than the average cell  
496 diameter + 2 standard deviation apart.

497 Oncogene-expressing cells were tracked over time and a cluster was associated with a tumor  
498 outcome if any of its cells lead to tumor formation. To identify which features were linked to  
499 this outcome, we took an information-theoretic approach to model selection. We fitted a  
500 logistic regression model for all possible linear combinations of features and selected the best  
501 model based on the Akaike information criterion (with correction for small sample sizes)<sup>12</sup> (Ref  
502 9). This model included only three features: number of oncogene-expressing cells in the  
503 cluster, number of oncogene-expressing cells in the organoid and number of cells in the cluster  
504 of which only the first (number of oncogene-expressing cells in the cluster) contributed  
505 significantly to tumor formation with an odds ratio of 9.1 (Figure 2c). Computing relative  
506 variable importance across all models also indicated that the number of oncogene-expressing  
507 cells in a cluster is the most important feature.

508

509 References for online material and methods:

510

- 511 1. D'Cruz, C.M. *et al.* c-MYC induces mammary tumorigenesis by means of a preferred  
512 pathway involving spontaneous Kras2 mutations. *Nature medicine* **7**, 235-239  
513 (2001).
- 514 2. Moody, S.E. *et al.* Conditional activation of Neu in the mammary epithelium of  
515 transgenic mice results in reversible pulmonary metastasis. *Cancer cell* **2**, 451-461  
516 (2002).
- 517 3. Abe, T. & Fujimori, T. Reporter mouse lines for fluorescence imaging. *Dev Growth*  
518 *Differ* **55**, 390-405 (2013).
- 519 4. Arteaga, C.L. *et al.* Treatment of HER2-positive breast cancer: current status and  
520 future perspectives. *Nat Rev Clin Oncol* **9**, 16-32 (2012).
- 521 5. Blancato, J., Singh, B., Liu, A., Liao, D.J. & Dickson, R.B. Correlation of amplification  
522 and overexpression of the c-myc oncogene in high-grade breast cancer: FISH, in situ  
523 hybridisation and immunohistochemical analyses. *Br J Cancer* **90**, 1612-1619 (2004).
- 524 6. Al-Kuraya, K. *et al.* Prognostic relevance of gene amplifications and coamplifications  
525 in breast cancer. *Cancer research* **64**, 8534-8540 (2004).
- 526 7. Kutner, R.H., Zhang, X.Y. & Reiser, J. Production, concentration and titration of  
527 pseudotyped HIV-1-based lentiviral vectors. *Nature protocols* **4**, 495-505 (2009).
- 528 8. Tischer, C., Norlin, N. & Pepperkok, R. "BigDataProcessor; Fiji plugin for visual  
529 inspection and processing of big image data. <http://doi.org/10.5281/zenodo.2574702>.  
530 (2019).
- 531 9. Tischer, C. & Pepperkok, R. CATS: Fiji plugin for context aware trainable  
532 segmentation of big image data. <http://doi.org/10.5281/zenodo.2574736>. (2019).
- 533 10. Imaris x64, v., Bitplane AG (Software available at <http://bitplane.com>).
- 534 11. Langfelder, P., Zhang, B. & Horvath, S. Defining clusters from a hierarchical cluster  
535 tree: the Dynamic Tree Cut package for R. *Bioinformatics* **24**, 719-720 (2008).
- 536 12. Calcagno, V. & de Mazancourt, C. glmulti: An R Package for Easy Automated Model  
537 Selection with (Generalized) Linear Models. *Journal of Statistical Software* **34** (2010).

538

539
